# Supplementary material
Source: PubMed Central journal article supplement (PMC6130921)
Supplement: NIHMS972321-supplement-supp.pdf [file NIHMS972321-supplement-supp.pdf]

Supplemental Material for  
“Secondary outcome analysis for data from an outcome-dependent  
sampling design”

by Yinghao Pan, Jianwen Cai, Matthew Longnecker, and Haibo Zhou

## 1 Additional Simulation Studies

We conducted additional simulation studies, for which the set-up is similar to the Collaborative Perinatal Project data. In Table S1, we let the full cohort size be 40000, and then select an ODS sample with 850 SRS and 200 supplementals. The simulated covariates mimic the distribution of PCB levels and other confounding variables in the CPP data set.

Figure S1 is a histogram plot showing the difference between  $\hat{\xi}_{IPW}$  and  $\hat{\xi}_{AIPW}$  in terms of estimating  $\gamma_2$ , where  $\gamma_2$  describes the association between EDU and  $Y_2$  (children’s birth weight). Averaged across all the simulations, the IPW and AIPW estimates are very close. However, it is possible that in certain simulations, there exists observable difference between IPW and AIPW estimator. In fact, in 185 out of 1000 simulations, the absolute difference between IPW and AIPW estimator is larger than 10.

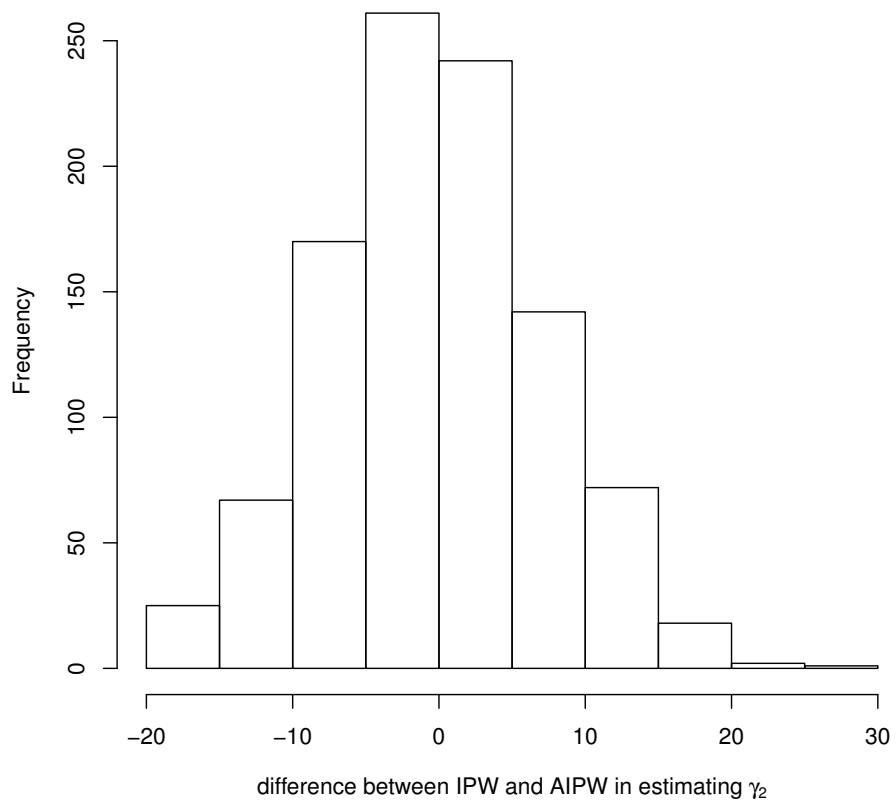

Figure S1: Histogram of the difference between  $\hat{\xi}_{IPW}$  and  $\hat{\xi}_{AIPW}$  with respect to estimating  $\gamma_2$  in 1000 simulations, where  $\gamma_2$  describes the association between EDU and  $Y_2$  (children's birth weight).

Table S1: Simulation results based on 1000 simulations with  $n_0 = 850$ ,  $n_1 = n_3 = 100$ , the validation sample size is  $n_V = 1050$ , the full cohort size is  $N = 40000$ .

| Parameters | Methods      | Mean    | Var     | $\widehat{Var}$ | CI    |
|------------|--------------|---------|---------|-----------------|-------|
| $\gamma_0$ | $\xi_{SRS}$  | 3099.07 | 7099.75 | 7091.51         | 0.955 |
|            | $\xi_{IPW}$  | 3097.82 | 5399.31 | 5643.01         | 0.946 |
|            | $\xi_{AIPW}$ | 3098.99 | 774.51  | 780.97          | 0.958 |
| $\gamma_1$ | $\xi_{SRS}$  | -4.60   | 78.68   | 80.91           | 0.958 |
|            | $\xi_{IPW}$  | -4.67   | 66.42   | 66.01           | 0.941 |
|            | $\xi_{AIPW}$ | -4.69   | 66.91   | 66.00           | 0.944 |
| $\gamma_2$ | $\xi_{SRS}$  | 0.16    | 71.23   | 74.27           | 0.946 |
|            | $\xi_{IPW}$  | 0.27    | 57.46   | 59.84           | 0.950 |
|            | $\xi_{AIPW}$ | 0.04    | 1.59    | 1.76            | 0.963 |
| $\gamma_3$ | $\xi_{SRS}$  | 14.96   | 114.28  | 111.82          | 0.952 |
|            | $\xi_{IPW}$  | 14.79   | 94.87   | 92.07           | 0.947 |
|            | $\xi_{AIPW}$ | 14.93   | 2.69    | 2.68            | 0.951 |
| $\gamma_4$ | $\xi_{SRS}$  | 199.10  | 1521.78 | 1485.73         | 0.949 |
|            | $\xi_{IPW}$  | 200.52  | 1219.41 | 1247.56         | 0.955 |
|            | $\xi_{AIPW}$ | 200.12  | 36.48   | 35.75           | 0.948 |
| $\gamma_5$ | $\xi_{SRS}$  | -123.19 | 1174.43 | 1185.49         | 0.954 |
|            | $\xi_{IPW}$  | -122.11 | 944.33  | 977.70          | 0.961 |
|            | $\xi_{AIPW}$ | -120.00 | 27.35   | 28.46           | 0.954 |

Results are based on the model  $Y_1 = \beta_0 + \beta_1 X + \beta_2 Z_1 + \beta_3 Z_2 + \beta_4 Z_3 + \beta_5 Z_4 + e$ ,  $Y_2 = \gamma_0 + \gamma_1 X + \gamma_2 Z_1 + \gamma_3 Z_2 + \gamma_4 Z_3 + \gamma_5 Z_4 + \epsilon$ , where  $(X, Z_1, Z_2, Z_3, Z_4)$  mimics the distribution of PCB, EDU, SES, RACE and GENDER from CPP data set. The error terms  $(e, \epsilon)$  follow a bivariate normal distribution with  $var(e) = \sigma_1^2$ ,  $var(\epsilon) = \sigma_2^2$ ,  $cov(e, \epsilon) = \rho\sigma_1\sigma_2$ ; the true parameter values are  $\beta_0 = 72, \beta_1 = 0.25, \beta_2 = 1.2, \beta_3 = 1.5, \beta_4 = 9, \beta_5 = 0, \gamma_0 = 3100, \gamma_1 = -5, \gamma_2 = 0, \gamma_3 = 15, \gamma_4 = 200, \gamma_5 = -120, \sigma_1 = 12, \sigma_2 = 500, \rho = 0.5$ . The cut off points for the ODS design are  $\mu_{Y_1} \pm \sigma_{Y_1}$ .
